1            ***Curtobacterium glycinis* sp. nov. from *Glycine max*, *Curtobacterium gossypii* sp.**  
2 **nov. from *Gossypium hirsutum* and *Curtobacterium oryzae* sp. nov. from *Oryza sativa*,**  
3 **three new *Curtobacterium* species and endophytes from agricultural crops**

4  
5            Sarah Seaton<sup>1</sup>, Jacqueline Lemaire<sup>1</sup>, Patrik Inderbitzin<sup>1</sup>, Victoria Knight-Connoni<sup>1</sup>,  
6 James F. White<sup>2</sup>, Martha E. Trujillo<sup>3</sup>

7  
8            <sup>1</sup>Indigo Ag, Inc., 500 Rutherford Avenue, Boston, MA 02129, United States

9            <sup>2</sup>Department of Plant Biology, Rutgers University, New Brunswick, NJ 08901,  
10 United States

11            <sup>3</sup>Departamento de Microbiología y Genética, Campus Miguel de Unamuno,  
12 University of Salamanca, Salamanca, Spain

13  
14  
15            **ABSTRACT**

16            Three new *Curtobacterium* species from healthy tissues of agricultural crop plants  
17 in the United States are reported. They are *Curtobacterium glycinis* sp. nov. from soybean  
18 in Missouri, *Curtobacterium gossypii* from cotton in Puerto Rico and *Curtobacterium*  
19 *oryzae* sp. nov. from rice in Texas.

20  
21            Keywords: novel species, taxonomy, bacteria, prokaryotes, endophytes, agriculture,  
22 *Actinobacteria*, *Microbacteriaceae*

23  
24  
25            **INTRODUCTION**

26            Bacterial endophytes of plants have many beneficial interactions with their hosts  
27 and play a crucial role in promoting plant health (Finkel et al. 2017; Schenk et al. 2012).  
28 Microbiomes of the major agricultural crops including Cotton (*Gossypium hirsutum* L.),  
29 rice (*Oryza sativa* L.) and soybean (*Glycine max* (L.) Merr.) have been characterized  
30 (Edwards et al. 2015; Liu et al. 2019; Longley et al. 2020; Qiao et al. 2017; Roman-Reyna  
31 et al. 2020; Ullah et al. 2019), and beneficial endophytes have been detected (Bertani et al.  
32 2016; de Almeida Lopes et al. 2018; Zhou et al. 2018). Plant-associated microorganisms  
33 are increasingly used for biotechnological applications, including biological control of

34 plant pathogens, plant growth promotion, or isolation of active compounds (Ryan et al.  
35 2008; Glick 2012; Bouizgarne 2013; Dey et al. 2014).

36 *Curtobacterium* is a genus of *Actinobacteria* in the family *Microbacteriaceae*  
37 comprising eight validly published species (Parte 2018). Several of the species have been  
38 isolated from agricultural plants. These include *Curtobacterium albidum* shown to  
39 counteract salt stress in rice (Vimal et al. 2019), *Curtobacterium flaccumfaciens* a  
40 pathogen of bean, beat, tulip and poinsetta (Collins and Jones 1983), *Curtobacterium*  
41 *herbarum* from grasses (Behrendt et al. 2002), and *Curtobacterium plantarum* from corn  
42 and soybean seed (Dunleavy 1989).

43 In this study, three *Curtobacterium* strains were isolated from healthy plant tissues  
44 in the United States. Strain OG107 from soybean in Missouri, strain VK105 from cotton in  
45 Puerto Rico, and strain SS108 from rice in Texas. The strains were characterized using  
46 molecular and phenotypic tests to determine their taxonomic placement. Our results  
47 indicate that the strains represent three new species of *Curtobacterium*, and we propose the  
48 names *Curtobacterium glycinis* sp. nov. (OG107), *Curtobacterium gossypii* sp. nov.  
49 (VK105) and *Curtobacterium oryzae* sp. nov. (SS108). These strains are taxonomically  
50 separated from the plant pathogens found within this genus.

51

## 52 **METHODS**

53 **Isolation.** Strains OG107 and SS108 were collected from the roots of healthy field-  
54 grown *Glycine max* in Missouri and *Oryza sativa* seedlings in Texas, United States,  
55 respectively. Plant tissue was washed with a mild detergent to remove particulates,  
56 surface-sterilized with bleach (1% v/v sodium hypochlorite) and ethanol (70% v/v), and  
57 homogenized. Serial dilutions of tissue homogenate were plated on a panel of media types  
58 for endophyte cultivation. Strain OG107, a small (0.7 mm diameter), pale yellow colony,  
59 arose on R2A agar after 5 days of incubation at 24°C, and strain SS108 arose as a non-  
60 descript colony on Actinomycete Isolation Agar. Both strains were streaked to purity and  
61 stored in glycerol (20% v/v) at -80°C until subjected to further testing.

62 Strain VK105 was isolated as described in Irizarry and White (2017). Briefly, seeds  
63 of wild, non-cultivated *G. hirsutum* plants were collected roadside in Guayama, Puerto  
64 Rico. Seeds were inoculated on Potato Dextrose Agar (PDA) and incubated at room  
65 temperature (25°C). Strain VK105 arose as an irregular yellow-orange pigmented colony.  
66 The colony was streaked to purity and stocked in 25% glycerol at -80°C until further  
67 analysis.

68           **Motility.** Strains were tested for flagellar-dependent swimming and swarming  
69 motility on R2A plates solidified with 0.3% and 0.6% agar, respectively. Three  
70 independent colonies were inoculated onto R2A broth and grown for 36 hr at 24°C. Broth  
71 cultures were normalized to an OD<sub>600</sub> of 0.1, and 1.5 µl of culture was spotted directly  
72 onto the surface of the motility agar. The diameter of colony expansion was measured for  
73 5 days.

74           **Carbon source utilization.** Substrate utilization was assessed using Biolog GenIII  
75 Microplates (Catalogue No. 1030) (Biolog Inc., Hayward, CA). Each bacterium was  
76 inoculated in duplicate plates using Protocol A described by the manufacturer, with the  
77 exception that plates were incubated at 30°C for 36 hr. Respiration leading to reduction of  
78 the tetrazolium indicator was measured by absorbance at 590 nm.

79           **Biochemical analyses.** Catalase activity was evaluated by immediate effervescence  
80 after the application of 3% (v/v) hydrogen peroxide solution via the tube method, a  
81 positive reaction was indicated by the production of bubbles. *Staphylococcus aureus*  
82 NCIMB 12702 and *Streptococcus pyogenes* ATCC 19615 were used as positive and  
83 negative controls, respectively. Oxidase activity was evaluated via the oxidation of Kovács  
84 oxidase reagent, 1% (w/v) tetra-methyl-p-phenylenediamine dihydrochloride in water, via  
85 the filter-paper spot method. A positive reaction was indicated when the microorganism's  
86 color changed to dark purple. *Pseudomonas aeruginosa* NCIMB 12469 and *Escherichia*  
87 *coli* ATCC 25922 were used as positive and negative controls, respectively.

88           **Phylogenetic and genomic analyses.** DNA was extracted from pure cultures using  
89 the Omega Mag-Bind Universal Pathogen Kit according to manufacturer's protocol with a  
90 final elution volume of 60µl (Omega Biotek Inc., Norcross, GA). DNA samples were  
91 quantified using Qubit fluorometer (ThermoFisher Scientific, Waltham, MA) and  
92 normalized to 100 ng. DNA was prepped using Nextera DNA Flex Library Prep kit  
93 according to manufacturer's instructions (Illumina Inc., San Diego, CA). DNA libraries  
94 were quantified via qPCR using KAPA Library Quantification kit (Roche Sequencing and  
95 Life Science, Wilmington, MA) and combined in equimolar concentrations into one 24-  
96 sample pool. Libraries were sequenced on a MiSeq using pair-end reads (2x200bp). Reads  
97 were trimmed of adapters and low-quality bases using Cutadapt (version 1.9.1) and  
98 assembled into contigs using MEGAHIT (version 1.1.2) (Li et al. 2015). Reads were  
99 mapped to contigs using Bowtie2 (version 2.3.4) (Langmead and Salzberg 2012), and  
100 contigs were assembled into scaffolds using BESST (2.2.8) (Sahlin et al. 2014).

101 Average nucleotide identity analyses were performed using the pyani ANIm  
102 algorithm (Richter and Rosselló-Móra 2009) implemented in the MUMmer package  
103 (Kurtz et al. 2004) retrieved from <https://github.com/widdowquinn/pyani>.

104 16S rRNA gene sequences were extracted from genome assemblies using barnap  
105 (Seemann 2019) and submitted to GenBank. Phylogenetic analyses based on the 16S  
106 rRNA gene were performed using FastTree (Price et al. 2010) with a General Time  
107 Reversible substitution model. Taxon sampling for each species is described in the  
108 respective phylogenetic tree figure legend.

109

## 110 **RESULTS**

### 111 **Phylogenetic and genomic analyses**

112 *Curtobacterium glycinis* sp. nov. strain OG107

113 Strain OG107 shared 98.9% 16S rRNA gene sequence identity with  
114 *Curtobacterium citreum* DSM 20528<sup>T</sup> and less with the remaining *Curtobacterium*  
115 species. A phylogenetic tree using FastTree (Price et al. 2010) confirmed the affiliation of  
116 strain OG107 with the genus *Curtobacterium*. OG107 was most closely related to *C.*  
117 *herbarum* P 420/07<sup>T</sup> with 84% bootstrap support (Figure 1). The top average nucleotide  
118 identity (ANI) value of OG107 was 89.2% with *C. luteum* ATCC 15830<sup>T</sup>. This value was  
119 well below the threshold for species demarcation (Richter and Rosselló-Móra 2009; Chun  
120 et al. 2018) providing further genomic support that strain OG107 represents a new  
121 genomic species of *Curtobacterium*.

122

123 *Curtobacterium gossypii* sp. nov. strain VK105

124 Strain VK105 shared 99.8% 16S rRNA gene sequence identity with  
125 *Curtobacterium citreum* DSM 20528<sup>T</sup> and less with the remaining *Curtobacterium*  
126 species. A phylogenetic tree using FastTree (Price et al. 2010) confirmed the affiliation of  
127 strain VK105 with the genus *Curtobacterium*. VK105 formed a monophyletic group with  
128 the species *C. albidum* and *C. citreum* supported by high bootstrap support (Figure 1) and  
129 was equally related to either of the two species. Average nucleotide identity (ANI) values  
130 of *C. albidum* DSM 20512<sup>T</sup> and *C. citreum* DSM 20528<sup>T</sup> to VK105 were both 87.7%.  
131 These values are well below the threshold for species demarcation (Richter and Rosselló-  
132 Móra 2009; Chun et al. 2018) providing further genomic support that strain VK105  
133 represents a new genomic species of *Curtobacterium*.

134

135 *Curtobacterium oryzae* sp. nov. strain SS108  
136 Strain SS108 shared 99.6% 16S rRNA gene sequence identity with *Curtobacterium*  
137 *luteum* strain DSM 20542<sup>T</sup> and less with the remaining *Curtobacterium* species. A  
138 phylogenetic tree using FastTree (Price et al. 2010) confirmed the affiliation of strain  
139 SS108 with the genus *Curtobacterium*. SS108 was most closely related to *C. luteum* with  
140 79% bootstrap support (Figure 1). The top average nucleotide identity (ANI) value of  
141 SS108 was 89.2% with *C. luteum* DSM 20542<sup>T</sup>. This value was well below the threshold  
142 for species demarcation (Richter and Rosselló-Móra 2009; Chun et al. 2018) providing  
143 further genomic support that strain SS108 represents a new genomic species of  
144 *Curtobacterium*.

145

#### 146 **Morphology, physiology and biochemical characteristics**

147 *Curtobacterium glycinis* sp. nov. strain OG107

148 Strain OG107 stained Gram-positive. Cells had a slightly curved rod shape (0.2-0.4  
149 µm in width and 1-3 µm in length); V and Y shaped forms were observed (Figure 2). They  
150 were aerobic, non-sporulating and showed motility. On nutrient agar, colonies were cream,  
151 entire, punctiform and convex. After 48 hr, good growth is observed on TSA, R2A and NA  
152 at 22 and 30°C. Growth was poor to moderate on the same media and incubation times at  
153 37°C. Growth is observed when media are supplemented with 4% NaCl (w/v). Strain OG  
154 107 was positive for catalase, but not for oxidase or urease. Being aerobic, the strain has an  
155 oxidative metabolism and according to the Biolog system, it is capable of using a range of  
156 substrates as carbon sources that include sugars, alcohol sugars and organic acids.  
157 Compared to its closest phylogenetic neighbor, *C. citreum* JCM 1345<sup>T</sup>, OG17 uses N-  
158 Acetyl-D-Galactosamine, D-arabitol, gentobiose, *myo*-inositol, mannitol and turanose as  
159 carbon sources. These tests help to differentiate between the two strains. A detailed  
160 description is given in Table 1 and the species description.

161 *Curtobacterium gossypii* sp. nov. strain VK105

162 The cells of strain VK105 stained Gram-positive, formed short irregular rods (0.4-0.6 µm  
163 in width and 2-4 µm in length), with cells diving by bending (Figure 3). Y shaped-forms  
164 were sometimes visible. Cells were non-motile and did not produce spores. Strain VK105  
165 showed good aerobic growth on R2A and TSA agars. On both media, yellow to orange  
166 colonies were observed after 2 days incubation at 22 and 30°C. At 7 days, colonies were  
167 circular, smooth, glistening and slightly convex. The new strain produced catalase but not  
168 oxidase. Strain VK105 has an oxidative metabolism and uses a range of substrates as

169 carbon sources that are also useful for to differentiate against its closest phylogenetic  
170 neighbors, *Curtobacterium citreum* and *C. albidum*, namely D-arabitol, L-fucose, D-  
171 glucuronic acid, and *myo*-inositol. These and other physiological characteristics are  
172 presented in Table 1 and the species description.

173

174 *Curtobacterium oryzae* sp. nov. strain SS108

175 Cells stained-Gram positive, are non-motile, non-spore-forming and rod shaped or  
176 slightly curved. In many cases, two cells remained together and formed V shapes (Figure  
177 4). Average cell size ranged from 0.2-0.4  $\mu\text{m}$  in width and 1.5 x 2  $\mu\text{m}$  in length. Colonies  
178 of strain SS108 were light yellow, entire, round and raised when grown on nutrient agar.  
179 After 2 days, good growth was observed on TSA and R2A agars at 22, 30 and 37°C. On  
180 nutrient agar, good growth was obtained at 30°C after 2 days and was moderate at 22 and  
181 37°C. However, after 7 days, good growth was also seen at 22°C. Aerobic growth.  
182 Tolerates 4% NaCl (w/v). Enzyme activity was detected for catalase, but not for oxidase or  
183 urease. Several carbon sources are useful to differentiate between the new strain and *C.*  
184 *luteum* JCM 1480<sup>T</sup> and include the utilization of N-Acetyl-D-Galactosamine, D-arabitol,  
185 gentobiose, *myo*-inositol and D-mannitol among others (Table 1). Other phenotypic  
186 characteristics are given in the species description.

187

188

#### 189 **DESCRIPTION OF CURTOBACTERIUM GLYCINIS SP. NOV.**

190

191 *Curtobacterium glycinis* (gly.ci'nis. N.L. fem. gen. n. *glycinis* of *Glycine max*, the  
192 soybean, referring to the origin of the type strain)

193

194 Cells are Gram-stain positive, non-spore forming, motile and rod-shaped with V  
195 and Y shapes produced. Aerobic and chemoorganotrophic. Colonies are circular, smooth,  
196 glistening and slightly convex. On R2A and nutrient agar, colonies are cream color and  
197 entire, punctiform and convex. Growth is abundant at 22 and 30°C but moderate at 37°C.  
198 Grows in the presence of 4% NaCl. Growth is observed between pH 5-7. Positive for  
199 catalase; negative for oxidase and urease. The following substrates are used as carbon  
200 sources: N-acetyl-D-glucosamine, N-acetyl-D-galactosamine, D-arabitol, D-cellobiose, L-  
201 fucose, gentiobiose, *myo*-inositol,  $\alpha$ -D-lactose, D-mannitol, D-melibiose,  $\beta$ -methyl-D-

202 glucoside, D-raffinose, turanose, D-gluconic acid, D-glucuronic acid, L-alanine, L-  
203 glutamic acid (weak), L-rhamnose, D-Glucose-6-PO<sub>4</sub>.

204 The type strain is resistant to nalidixic acid and aztreonam.

205

206 The type strain OG 17<sup>T</sup> was isolated from the roots of healthy field-grown *Glycine*  
207 *max* in Missouri, USA.

208

209

## 210 **DESCRIPTION OF CURTOBACTERIUM GOSSYPHII SP. NOV.**

211

212 *Curtobacterium gossypii* (gos.sy'pi.i. N.L. gen. n. *gossypii* of *Gossypium*, the  
213 generic name of cotton, referring to the origin of the type strain)

214

215 Cells are Gram-stain positive, non-motile, non-spore-forming, coccoid or rod-  
216 shaped. Aerobic and chemoorganotrophic. Yellow to orange colonies on R2A and TSA  
217 agars. Growth on these media is observed after 48 h. Catalase is produced but not oxidase.  
218 Grows in the presence of 1 - 4 % NaCl; weak at 8% and at pH 5-7. The following  
219 substrates are used as sole carbon sources: dextrin, D-maltose, D-trehalose, D-cellobiose,  
220 gentiobiose, sucrose, D-turanose, stachyose, D-raffinose,  $\alpha$ -D-lactose, D-melibiose,  $\beta$ -  
221 methylD-glucoside, D-salicin, N-acetyl-D-glucosamine,  $\alpha$ -D-glucose, D-mannose, D-  
222 fructose, D-galactose, inosine, sodium lactate, D-mannitol, D-arabitol, *myo*-inositol,  
223 glycerol, L-aspartic acid, L-glutamic acid, pectin, D-arabitol, D-gluconic acid, D-  
224 glucuronic acid and glucuronamide.

225 The type strain is resistant to nalidixic acid and aztreonam.

226

227 The type strain, VK105<sup>T</sup>, was isolated from seeds of wild cotton collected in Puerto  
228 Rico, USA.

229

## 230 **DESCRIPTION OF CURTOBACTERIUM ORYZAE SP. NOV.**

231

232 *Curtobacterium oryzae* (o.ry'zae. N.L. gen. n. *oryzae* of rice, referring to the origin of the  
233 type strain)

234

235 Cells are Gram-stain positive, non-motile, non-spore-forming and rod shaped or  
236 slightly curved; V shapes are formed. Aerobic and chemoorganotrophic. Colonies are light  
237 yellow, entire, round and raised on nutrient agar. Good growth is obtained at 22, 30 and  
238 37°C on the media tested. Grows on media supplemented with 4% NaCl and at pH 5-7.  
239 Positive for catalase, but negative for oxidase or urease. The following substrates are used  
240 as carbon sources: N-Acetyl-D-Glucosamine, N-Acetyl-D-Galactosamine, N-Acetyl  
241 Neuraminic Acid, D-Arabitol, D-Cellobiose, L-Fucose, Gentiobiose, myo-Inositol,  $\alpha$ -D-  
242 Lactose, D-Mannitol, D-Melibiose,  $\beta$ -Methyl-D-Glucoside, D-Raffinose, D-Sorbitol,  
243 Turanose, D-Gluconic Acid, D-Glucuronic Acid, L-Alanine, L-Glutamic Acid, L-  
244 Rhamnose, D-Glucose-6-PO<sub>4</sub> and Acetic Acid.

245 The type strain is resistant to nalidixic acid and aztreonam.

246 The type strain, SS108<sup>T</sup>, was isolated from *Oryza sativa* seedlings collected in  
247 Texas, USA.

248

#### 249 **ACKNOWLEDGEMENTS**

250 We would like to thank Professor Aharon Oren, The Hebrew University of  
251 Jerusalem, for checking Latin species names. Support was provided by USDA-NIFA  
252 Multistate Project W4147 and the New Jersey Agricultural Experiment Station.

253

#### 254 **LITERATURE CITED**

255 Aizawa, T., Ve, N. B., Kimoto, K., Iwabuchi, N., Sumida, H., Hasegawa, I., et al.  
256 2007. *Curtobacterium ammoniigenes* sp. nov., an ammonia-producing bacterium isolated  
257 from plants inhabiting acidic swamps in actual acid sulfate soil areas of Vietnam. Int. J.  
258 Syst. Evol. Microbiol. 57:1447–1452.

259 de Almeida Lopes, K. B., Carpentieri-Pipolo, V., Fira, D., Balatti, P. A., López, S.  
260 M. Y., Oro, T. H., et al. 2018. Screening of bacterial endophytes as potential biocontrol  
261 agents against soybean diseases. J. Appl. Microbiol. 125:1466–1481.

262 Behrendt, U., Ulrich, A., Schumann, P., Naumann, D., and Suzuki, K. 2002.

263 Diversity of grass-associated Microbacteriaceae isolated from the phyllosphere and litter



264 layer after mulching the sward; polyphasic characterization of *Subtercola pratensis* sp.  
265 nov., *Curtobacterium herbarum* sp. nov. and *Plantibacter flavus* gen. nov., sp. nov. Int. J.  
266 Syst. Evol. Microbiol. 52:1441–1454.

267 Bertani, I., Abbruscato, P., Piffanelli, P., Subramoni, S., and Venturi, V. 2016. Rice  
268 bacterial endophytes: isolation of a collection, identification of beneficial strains and  
269 microbiome analysis. Environ. Microbiol. Rep. 8:388–398.

270 Bouizgarne, B. 2013. Bacteria for plant growth promotion and disease  
271 management. In *Bacteria in Agrobiolgy: Disease Management*, Springer, p. 15–47.

272 Chun, J., Oren, A., Ventosa, A., Christensen, H., Arahal, D. R., da Costa, M. S., et  
273 al. 2018. Proposed minimal standards for the use of genome data for the taxonomy of  
274 prokaryotes. Int. J. Syst. Evol. Microbiol. 68:461–466.

275 Collins, M., and Jones, D. 1983. Reclassification of *Corynebacterium*  
276 *flaccumfaciens*, *Corynebacterium betae*, *Corynebacterium oortii* and *Corynebacterium*  
277 *poinsettiae* in the genus *Curtobacterium*, as *Curtobacterium flaccumfaciens* comb. nov.  
278 Microbiology. 129:3545–3548.

279 Dey, R., Pal, K. K., and Tilak, K. 2014. Plant growth promoting rhizobacteria in  
280 crop protection and challenges. In *Future Challenges in Crop Protection Against Fungal*  
281 *Pathogens*, Springer, p. 31–58.

282 Dunleavy, J. 1989. *Curtobacterium plantarum* sp. nov. is ubiquitous in plant leaves  
283 and is seed transmitted in soybean and corn. Int. J. Syst. Evol. Microbiol. 39:240–249.

284 Edwards, J., Johnson, C., Santos-Medellín, C., Lurie, E., Podishetty, N. K.,  
285 Bhatnagar, S., et al. 2015. Structure, variation, and assembly of the root-associated  
286 microbiomes of rice. Proc. Natl. Acad. Sci. 112:E911–E920.

- 287 Finkel, O. M., Castrillo, G., Paredes, S. H., González, I. S., and Dangl, J. L. 2017.  
288 Understanding and exploiting plant beneficial microbes. *Curr. Opin. Plant Biol.* 38:155–  
289 163.
- 290 Glick, B. R. 2012. Plant growth-promoting bacteria: mechanisms and applications.  
291 Scientifica. 2012.
- 292 Irizarry, I., and White, J. 2017. Application of bacteria from non-cultivated plants  
293 to promote growth, alter root architecture and alleviate salt stress of cotton. *J. Appl.*  
294 *Microbiol.* 122:1110–1120.
- 295 Kurtz, S., Phillippy, A., Delcher, A. L., Smoot, M., Shumway, M., Antonescu, C.,  
296 et al. 2004. Versatile and open software for comparing large genomes. *Genome Biol.*  
297 5:R12.
- 298 Langmead, B., and Salzberg, S. L. 2012. Fast gapped-read alignment with bowtie  
299 2. *Nat Methods.* 9 Available at: <https://doi.org/10.1038/nmeth.1923>.
- 300 Li, D., Liu, C.-M., Luo, R., Sadakane, K., and Lam, T.-W. 2015. MEGAHIT: an  
301 ultra-fast single-node solution for large and complex metagenomics assembly via succinct  
302 de Bruijn graph. *Bioinformatics.* 31:1674–1676.
- 303 Liu, F., Hewezi, T., Lebeis, S. L., Pantalone, V., Grewal, P. S., and Staton, M. E.  
304 2019. Soil indigenous microbiome and plant genotypes cooperatively modify soybean  
305 rhizosphere microbiome assembly. *BMC Microbiol.* 19:1–19.
- 306 Longley, R., Noel, Z. A., Benucci, G. M. N., Chilvers, M., Trail, F., and Bonito, G.  
307 2020. Crop management impacts the soybean (*Glycine max*) microbiome. *Front.*  
308 *Microbiol.* 11:1116.
- 309 Parte, A. C. 2018. LPSN-List of prokaryotic names with standing in nomenclature  
310 (bacterio.net), 20 years on. *Int. J. Syst. Evol. Microbiol.* 68:1825–1829.

- 311 Price, M. N., Dehal, P. S., and Arkin, A. P. 2010. FastTree 2 - approximately  
312 maximum-likelihood trees for large alignments. PLoS ONE. 5:e9490.
- 313 Qiao, Q., Wang, F., Zhang, Jingxia, Chen, Y., Zhang, C., Liu, G., et al. 2017. The  
314 variation in the rhizosphere microbiome of cotton with soil type, genotype and  
315 developmental stage. Sci. Rep. 7:1–10.
- 316 Richter, M., and Rosselló-Móra, R. 2009. Shifting the genomic gold standard for  
317 the prokaryotic species definition. Proc. Natl. Acad. Sci. 106:19126–19131.
- 318 Roman-Reyna, V., Pinili, D., Borja, F. N., Quibod, I. L., Groen, S. C., Alexandrov,  
319 N., et al. 2020. Characterization of the leaf microbiome from whole-genome sequencing  
320 data of the 3000 rice genomes project. Rice. 13:1–8.
- 321 Ryan, R. P., Germaine, K., Franks, A., Ryan, D. J., and Dowling, D. N. 2008.  
322 Bacterial endophytes: recent developments and applications. FEMS Microbiol. Lett.  
323 278:1–9.
- 324 Sahlin, K., Vezzi, F., Nystedt, B., Lundeberg, J., and Arvestad, L. 2014. BESST-  
325 efficient scaffolding of large fragmented assemblies. BMC Bioinformatics. 15:281.
- 326 Schenk, P. M., Carvalhais, L. C., and Kazan, K. 2012. Unraveling plant-microbe  
327 interactions: can multi-species transcriptomics help? Trends Biotechnol. 30:177–184.
- 328 Seemann, T. 2019. *barrnap 0.9: rapid ribosomal RNA prediction*. Available at:  
329 <https://github.com/tseemann/barrnap>.
- 330 Ullah, A., Akbar, A., Luo, Q., Khan, A. H., Manghwar, H., Shaban, M., et al. 2019.  
331 Microbiome diversity in cotton rhizosphere under normal and drought conditions. Microb.  
332 Ecol. 77:429–439.
- 333 Vimal, S. R., Patel, V. K., and Singh, J. S. 2019. Plant growth promoting  
334 *Curtobacterium albidum* strain SRV4: an agriculturally important microbe to alleviate  
335 salinity stress in paddy plants. Ecol. Indic. 105:553–562.

336           Zhou, W., Wheeler, T. A., Starr, J. L., Valencia, C. U., and Sword, G. A. 2018. A  
337   fungal endophyte defensive symbiosis affects plant-nematode interactions in cotton. *Plant*  
338   *Soil.* 422:251–266.  
339  
340

341 **TABLES**

342

343 **Table 1.** Physiological characteristics of newly described *Curtobacterium glycinis*, *C.*  
 344 *gossypii* and *C. oryzae* species and related *Curtobacterium* type strains. All strains were  
 345 positive for the assimilation of dextrin, D-fructose, D-galactose,  $\alpha$ -D-glucose, D-mannose  
 346 and sucrose (data not shown).

|                                              | <i>C.</i><br><i>gossypii</i><br>VK105 | <i>C.</i><br><i>oryzae</i><br>OG107 | <i>C.</i><br><i>glycini</i><br><i>s</i><br>SS108 | <i>C.</i><br><i>citreu</i><br><i>m</i><br>JCM<br>1345 <sup>T</sup> | <i>C.</i><br><i>pusillu</i><br><i>m</i> JCM<br>1350 <sup>T</sup> | <i>C.</i><br><i>luteum</i><br>JCM<br>1480 <sup>T</sup> | <i>C.</i><br><i>albidum</i><br>NBRC<br>15078 <sup>T</sup> | <i>C.</i><br><i>herbaru</i><br><i>m</i> DSM<br>14013 <sup>T</sup> |
|----------------------------------------------|---------------------------------------|-------------------------------------|--------------------------------------------------|--------------------------------------------------------------------|------------------------------------------------------------------|--------------------------------------------------------|-----------------------------------------------------------|-------------------------------------------------------------------|
| <b>General characteristics:</b>              |                                       |                                     |                                                  |                                                                    |                                                                  |                                                        |                                                           |                                                                   |
| <b>Colony pigment</b>                        |                                       | light yellow                        | ivory                                            | yellow                                                             | yellow                                                           | yellow                                                 | ivory                                                     | orange                                                            |
| <b>Motility</b>                              | -                                     | w                                   | w                                                | +                                                                  | +                                                                | +                                                      | -                                                         | +                                                                 |
| <b>Oxidase</b>                               | -                                     | -                                   | -                                                | -                                                                  | -                                                                | -                                                      | -                                                         | -                                                                 |
| <b>Catalase</b>                              | +                                     | +                                   | +                                                | +                                                                  | +                                                                | +                                                      | +                                                         | +                                                                 |
| <b>Urease</b>                                | -                                     | -                                   | -                                                | -                                                                  | -                                                                | -                                                      | -                                                         | nr                                                                |
| <b>Growth with 4% NaCl</b>                   | +                                     | +                                   | +                                                | nr                                                                 | nr                                                               | nr                                                     | nr                                                        | nr                                                                |
| <b>Growth with 8% NaCl</b>                   | +                                     | -                                   | -                                                | nr                                                                 | nr                                                               | nr                                                     | nr                                                        | nr                                                                |
| <b>Utilization of:</b>                       |                                       |                                     |                                                  |                                                                    |                                                                  |                                                        |                                                           |                                                                   |
| <b>N-Acetyl-D-Glucosamine</b>                | +                                     | +                                   | +                                                | +                                                                  | -                                                                | +                                                      | w                                                         | nr                                                                |
| <b>N-Acetyl-D-Galactosamine</b>              | -                                     | +                                   | +                                                | -                                                                  | -                                                                | -                                                      | -                                                         | nr                                                                |
| <b>N-Acetyl Neuraminic Acid</b>              | -                                     | +                                   | -                                                | nr                                                                 | nr                                                               | nr                                                     | nr                                                        | nr                                                                |
| <b>D-Arabitol</b>                            | +                                     | +                                   | +                                                | -                                                                  | w                                                                | -                                                      | -                                                         | nr                                                                |
| <b>D-Cellobiose</b>                          | +                                     | +                                   | +                                                | +                                                                  | -                                                                | +                                                      | +                                                         | nr                                                                |
| <b>L-Fucose</b>                              | w                                     | +                                   | +                                                | +                                                                  | -                                                                | +                                                      | -                                                         | nr                                                                |
| <b>Gentiobiose</b>                           | +                                     | +                                   | +                                                | -                                                                  | +                                                                | -                                                      | +                                                         | nr                                                                |
| <b>myo-Inositol</b>                          | +                                     | +                                   | +                                                | -                                                                  | -                                                                | -                                                      | -                                                         | nr                                                                |
| <b><math>\alpha</math>-D-Lactose</b>         | +                                     | +                                   | +                                                | +                                                                  | -                                                                | +                                                      | +                                                         | nr                                                                |
| <b>D-Mannitol</b>                            | +                                     | +                                   | +                                                | -                                                                  | +                                                                | -                                                      | w                                                         | +                                                                 |
| <b>D-Melibiose</b>                           | +                                     | +                                   | +                                                | +                                                                  | +                                                                | +                                                      | w                                                         | +                                                                 |
| <b><math>\beta</math>-Methyl-D-Glucoside</b> | +                                     | +                                   | +                                                | -                                                                  | +                                                                | -                                                      | w                                                         | nr                                                                |

|                          |   |   |   |   |   |   |   |    |
|--------------------------|---|---|---|---|---|---|---|----|
| <b>D-Raffinose</b>       | + | + | + | - | - | - | + | nr |
| <b>D-Sorbitol</b>        | w | + | - | - | + | - | + | +  |
| <b>Turanose</b>          | + | + | + | - | + | - | + | nr |
| <b>D-Gluconic Acid</b>   | + | + | + | - | + | - | + | nr |
| <b>D-Glucuronic Acid</b> | + | + | + | - | - | - | - | nr |
| <b>L-Alanine</b>         | + | + | + | - | - | - | w | nr |
| <b>L-Glutamic Acid</b>   | + | + | w | + | - | - | - | nr |
| <b>L-Rhamnose</b>        | w | + | + | - | - | - | - | +  |
| <b>D-Glucose-6-PO4</b>   | - | + | + | - | - | - | - | nr |
| <b>Acetic Acid</b>       | w | + | - | - | - | - | - | nr |
|                          |   |   |   |   |   |   |   |    |

347

348

349 +, Positive; w, Weakly positive; -, Negative; nr, Not reported.

350

351 Data from this study, Aizawa et al. (2007) and Behrendt et al. (2002).

352  
353  
354  
355

## FIGURES

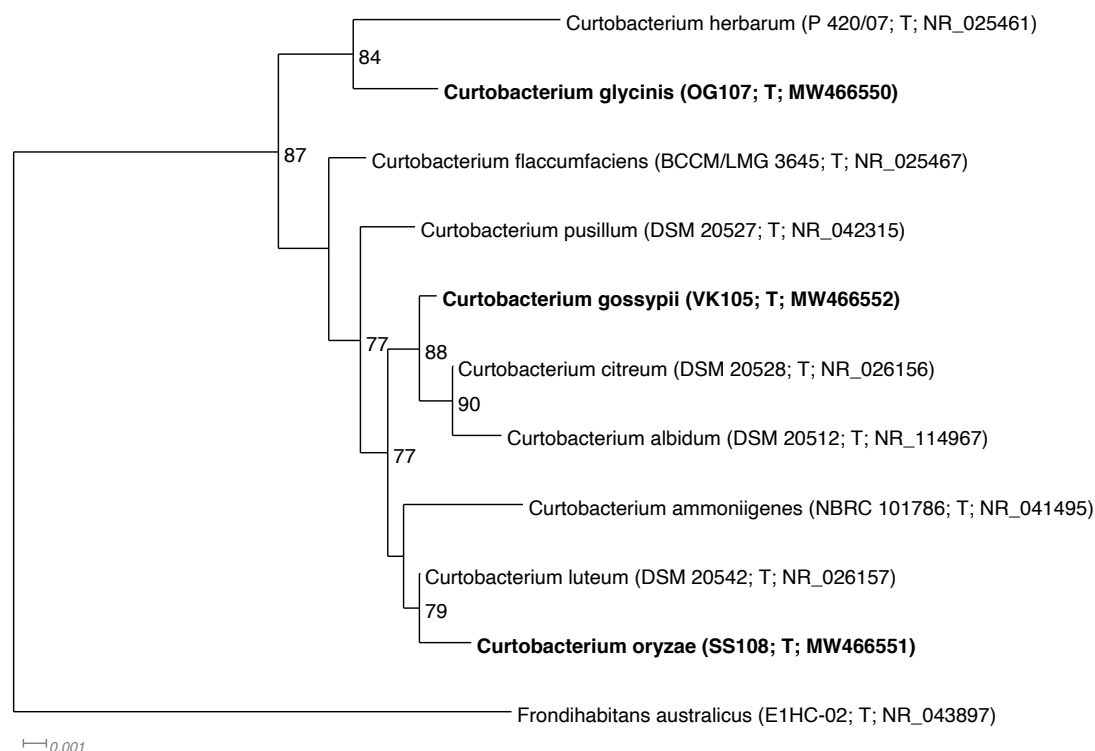

356  
357  
358  
359  
360  
361  
362  
363  
364  
365  
366  
367  
368

**Figure 1.** Phylogenetic 16S rRNA gene tree of *Curtobacterium glycinis* sp. nov. strain OG107, *Curtobacterium gossypii* sp. nov. strain VK105, *Curtobacterium oryzae* sp. nov. strain SS108 and relatives generated using FastTree (Price et al. 2010). All validly published *Curtobacterium* species were included in the tree, the tree is rooted with *Frondihabitans australicus*. New species are in bold. Strain identifiers and GenBank accession numbers follow species names, T stands for ‘type’. Support values above 70% are given by the branches. *Curtobacterium glycinis* is most closely related to *C. herbarum* with 84% support, *Curtobacterium gossypii* to *C. albidum* and *C. citreum* with 82% support and *Curtobacterium oryzae* to *C. luteum* with 79% support. Branch lengths are proportional to the changes along the branches, a scale bar is provided.

369  
370  
371  
372  
373  
374  
375  
376  
377  
378  
379  
380  
381  
382  
383  
384  
385  
386

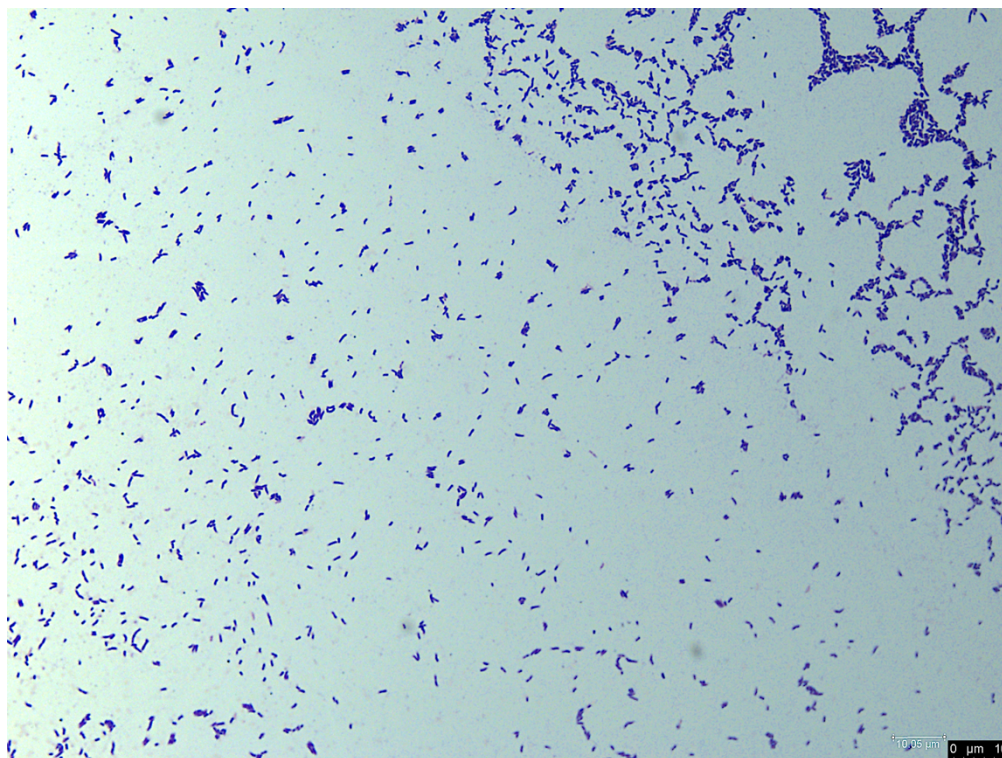

**Figure 2.** Morphology of *Curtobacterium glycinis* sp. nov. strain OG107 depicted following Gram stain using bright field microscopy. Bar = 10  $\mu$ m.



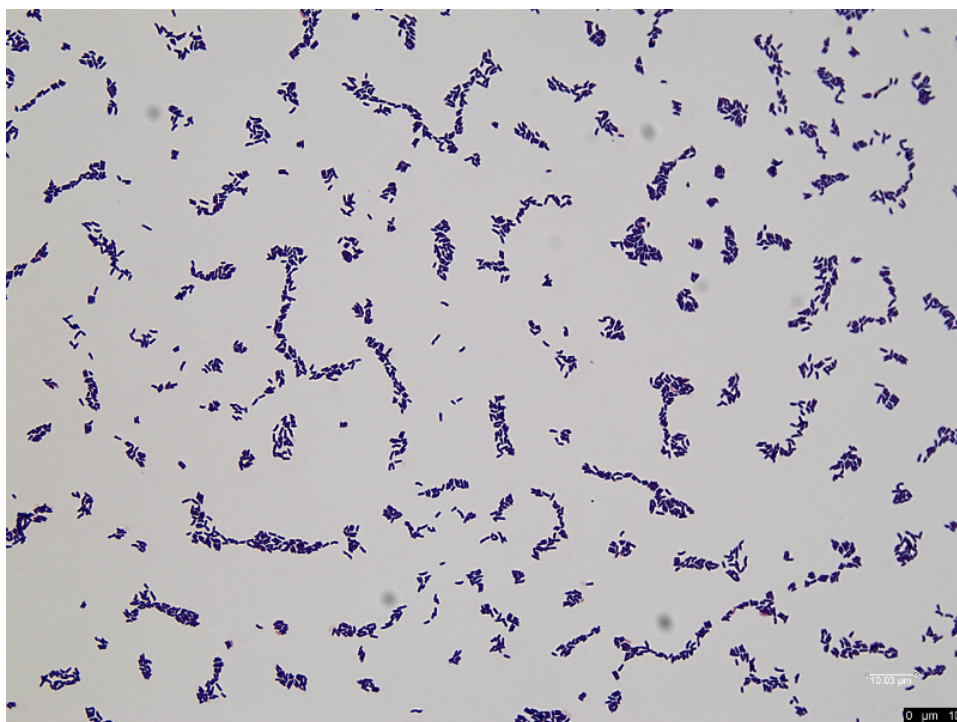

387

388

389 **Figure 3.** Morphology of *Curtobacterium gossypii* sp. nov. strain VK105 depicted

390 following Gram stain using bright field microscopy. Bar = 10 μm.

391

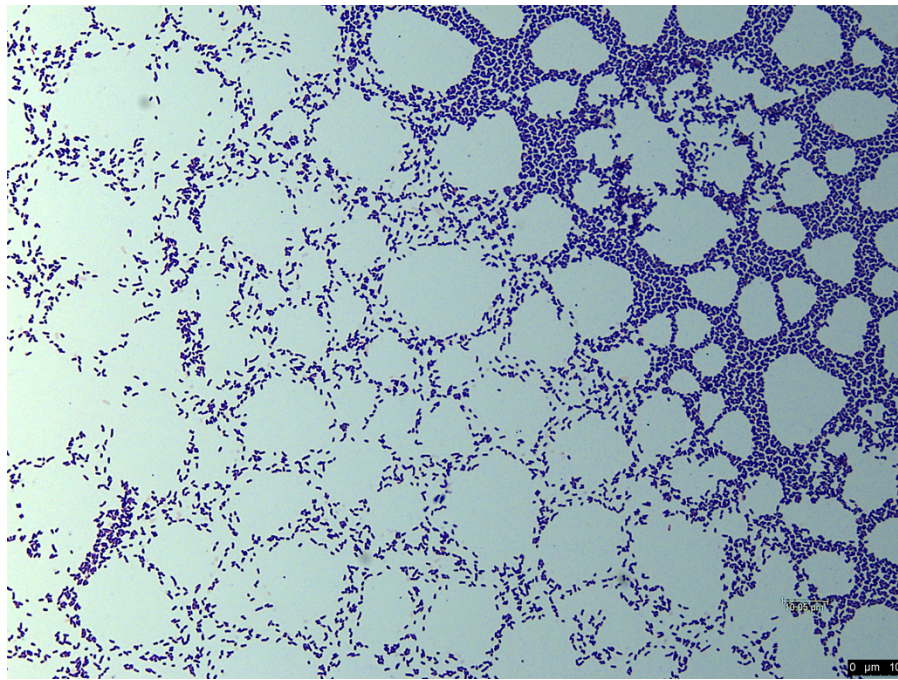

392

393

394 **Figure 4.** Morphology of *Curtobacterium oryzae* sp. nov. strain SS108 depicted following

395 Gram stain using bright field microscopy. Bar = 10 μm.
